# Supplementary material for: Anti-fatigue adhesive and tough hydrogels regulated by adenine and uracil
Source: Royal Society of Chemistry journal article supplement (doi:10.1039/c8py00868j), 2018-01-01
Supplement: c8py00868j2.pdf [file c8py00868j2.pdf]

## Supporting information

### Anti-fatigue Adhesive and Tough Hydrogels Regulated by Adenine and Uracil

Xin Liu, Qin Zhang, Yanchao Qiao, Lijie Duan\*, Guanghui Gao\*

Polymeric and Soft Materials Laboratory, School of Chemical Engineering and  
Advanced Institute of Materials Science, Changchun University of Technology,  
Changchun 130012, China

Corresponding author: Lijie Duan, Guanghui Gao

E-mail: duanlijie@ccut.edu.cn (L. Duan), ghgao@ccut.edu.cn (G. Gao)

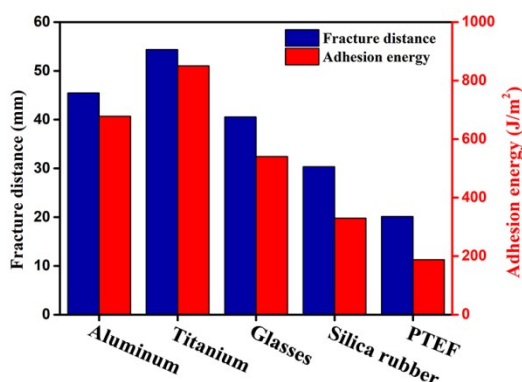

**Figure S1.** The Fracture distance and maximum adhesion energy of AU<sub>7</sub>-C<sub>30</sub> adhesive hydrogel.

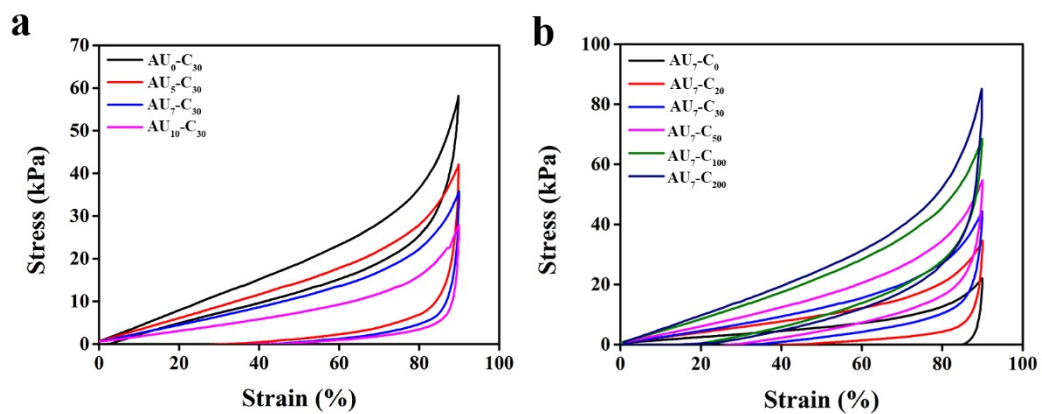

**Figure S2.** The compress performance of adhesive hydrogels: (a) with different A-U and (b) with different MBA.

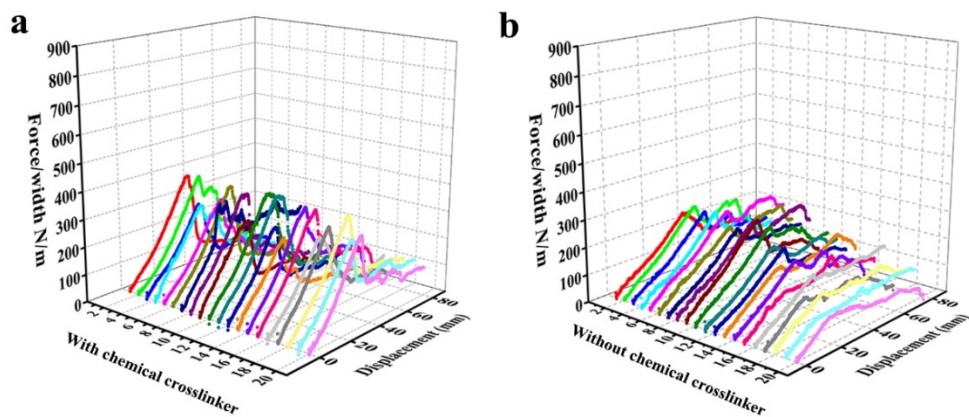

**Figure S3.** Anti-fatigue adhesive behavior of adhesive hydrogels for aluminum substrate: (a) with chemical crosslinker of MBA and (b) with chemical crosslinker of MBA.

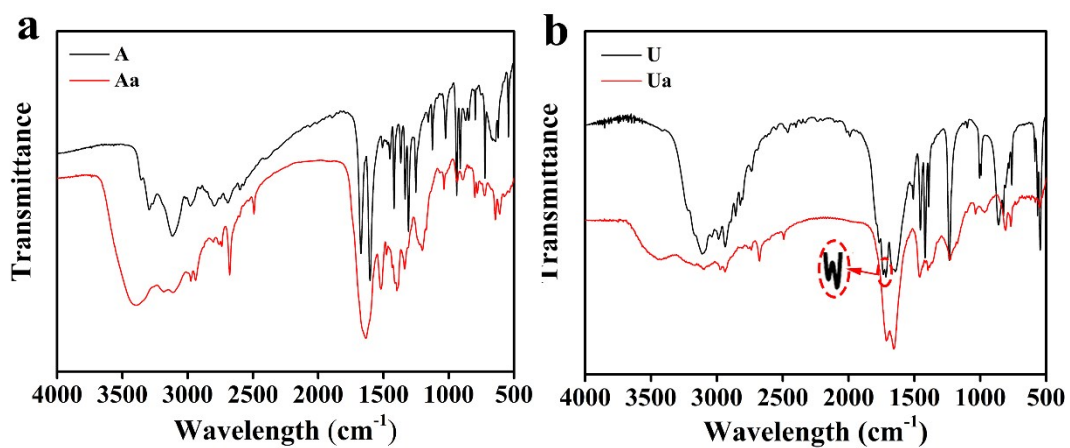

**Figure S4.** FTIR spectroscopy of (a) A-Aa and (b) U-Ua.

According to FTIR spectroscopy, Aa and Ua are successfully synthesized. The strong band at  $1635\text{ cm}^{-1}$  was attributed to the functionalized acrylic group of Aa. And the successful synthesis of acrylated uracil was confirmed by the strong peak at  $1713\text{ cm}^{-1}$ .
